# Supplementary material for: Functional silver-based nanomaterials affecting zebrafish development: the adverse outcomes in relation to the nanoparticle physical and chemical structure
Source: Royal Society of Chemistry journal article supplement (doi:10.1039/d3en00813d), 2024-01-01
Supplement: d3en00813d1.pdf [file d3en00813d1.pdf]

## Electronic Supplementary Information

### Functional silver-based nanomaterials affecting zebrafish development: the adverse outcomes in relation to the nanoparticle physical and chemical structure

Patrizia Bonfanti<sup>1,§,\*</sup>, Anita Colombo<sup>1,§</sup>, Rossella Bengalli<sup>1</sup>, Ilaria Zanoni<sup>2</sup>, Maurizio Gualtieri<sup>1</sup>, Magda Blosi<sup>2</sup>, Anna Costa<sup>2</sup>, Paride Mantecca<sup>1,\*</sup>.

<sup>1</sup>*University of Milano Bicocca, Dipartimento di Scienze dell'Ambiente e della Terra, Piazza della Scienza 1, 20126 Milano, Italy.*

<sup>2</sup>*Istituto di Scienza, Tecnologia e Sostenibilità per lo Sviluppo dei Materiali Ceramici, National Research Council of Italy (CNR-ISSMC, former ISTECC), Via Granarolo 64, 48018 Faenza, Italy.*

*§ These authors contributed equally to the work*

*\* Corresponding authors: ([patrizia.bonfanti@unimib.it](mailto:patrizia.bonfanti@unimib.it)); ([paride.mantecca@unimib.it](mailto:paride.mantecca@unimib.it))*

This Electronic Supplementary Information document (ESI) contains one text section, N° 7 figures and N°2 tables

### Materials and Methods

#### S1: Chemicals

All analytical-grade reagents, Tricaine (MS-222), reagents for histology and scanning electron microscopy analysis, salts for FET solution, except Instant Ocean (Aquarium systems, Sarrebourg, France) were purchased from Sigma-Aldrich S.r.l., Italy.

#### S2: Animals

A breeding colony of Wild-type zebrafish (AB strain) was raised in a facility at University of Milano-Bicocca, Dept. of Environmental and Earth Sciences (Italy), according to the Italian laws, rules and regulations (Legislative Decree no. 116/92; authorization n. 0020984-12/02/2018). In detail, adults were maintained at 28 °C with a 14/10 h light/dark cycle in a closed flow-through system (Tecniplast s.p.a., Buguggiate Italy). Water supplied to the system was filtered by reverse osmosis (pH 7.5–8), and Instant Ocean® salt was added to the water to raise the conductivity to ~500 µS/cm (system water).

Zebrafish embryos were collected after a natural spawning of adult zebrafish pairs, located in breeding tanks and separated by sex (3:2 male to female ratio) with a barrier overnight (ON). The next morning at the onset of light, the barrier was removed and adults were allowed to mate. Fertilized eggs were collected in a strainer within 30 min after mating and sorted to eliminate faeces and unfertilized eggs, then selected and developmentally staged by hours post fertilization (hpf) under a stereomicroscope (Zeiss, Germany).

## Results

### FIGURES

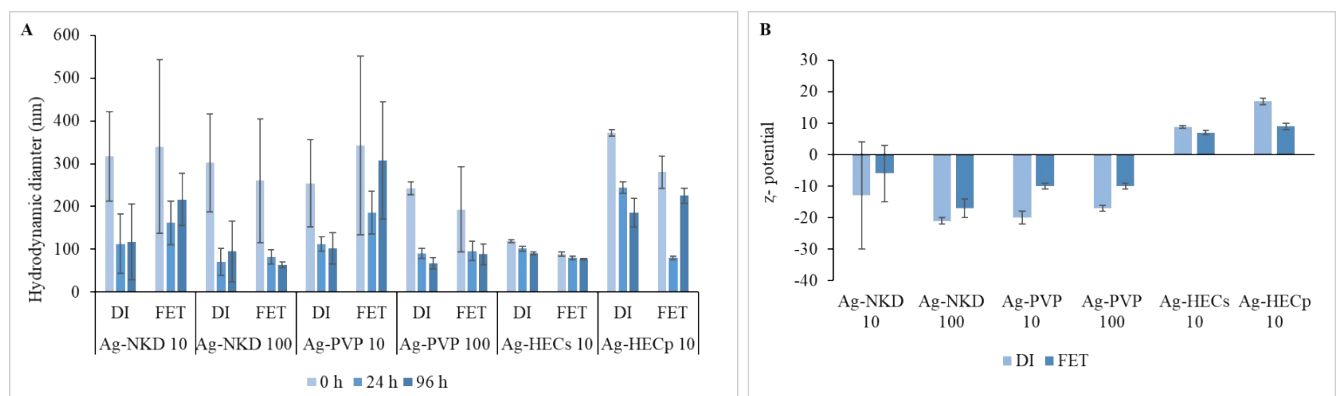

**Fig. S1** Physical-chemical properties of the Ag-NPs. Hydrodynamic diameter (A) and  $\zeta$  potential (B) by Dynamic and Electrophoretic Light Scattering. The average size and standard deviation were calculated using the maximum peak values for each hydrodynamic and  $\zeta$ -potential measurements from triplicate trials for each suspension. Data are represented as mean  $\pm$  SD. FET: embryo rearing solution; DI: distilled water.

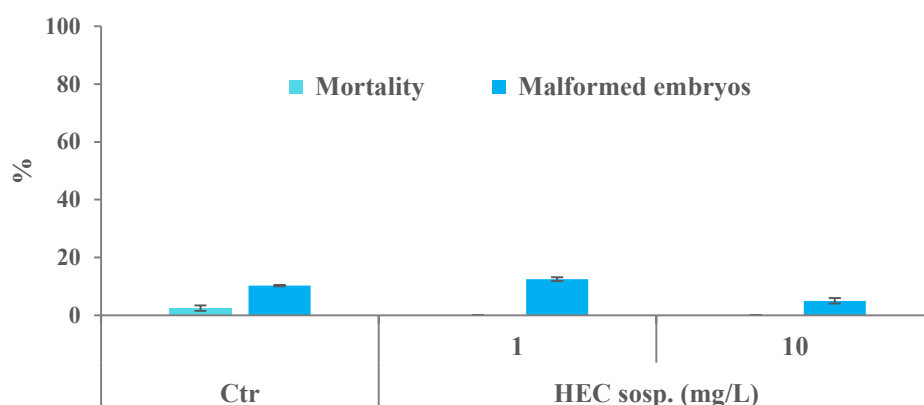

**Fig. S2** FET test on hydroxyethyl cellulose suspension (HECs). Mortality and malformation rates in 96 hpf zebrafish embryos after exposure to 1 and 10 mg/L of HECs.

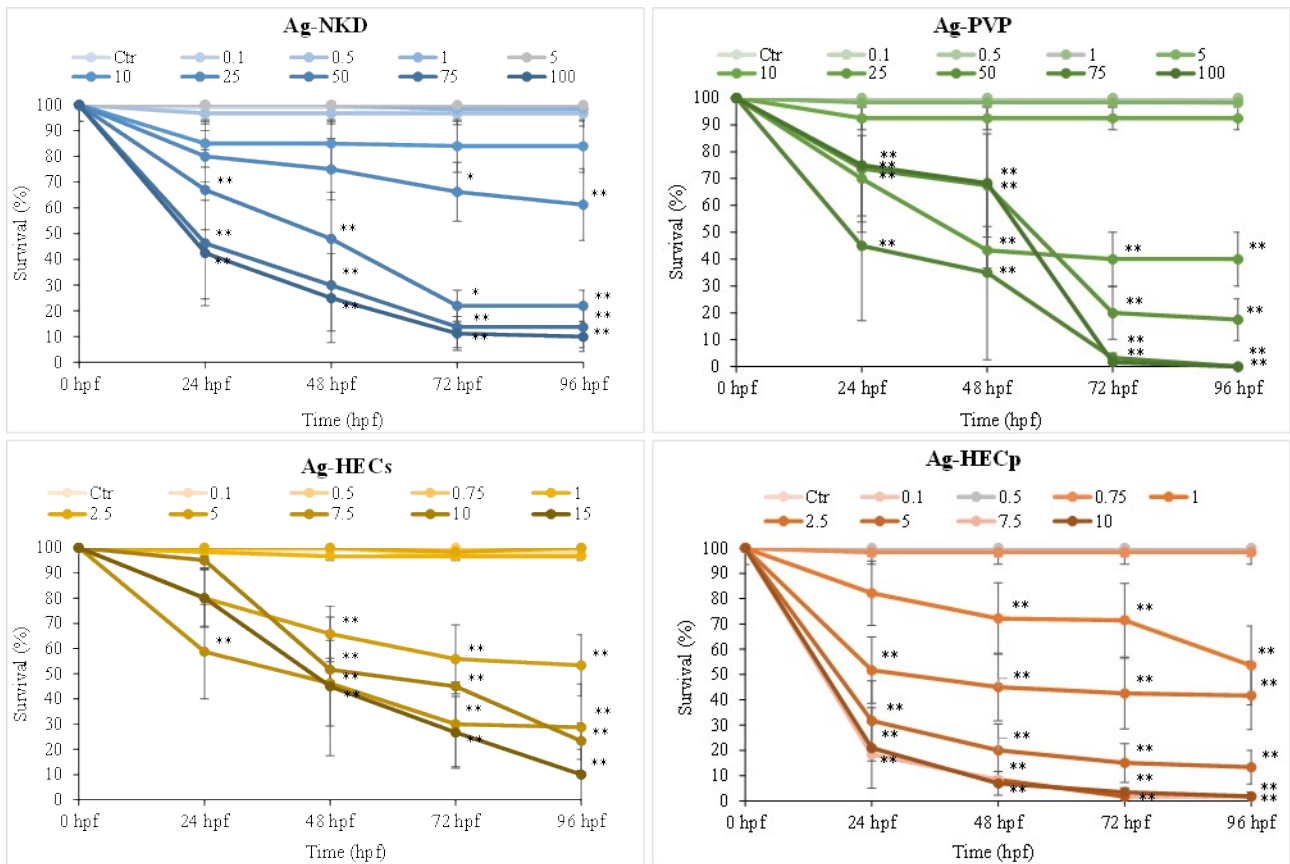

**Fig. S3** Cumulative daily survival rate in zebrafish embryos exposed to Ag-NPs during FET. All values in the graphs are given as mean  $\pm$  SE of at least three independent assays. \* $p < 0.05$ , \*\* $p < 0.01$  indicate statistical difference from control (ANOVA + post-hoc Bonferroni).

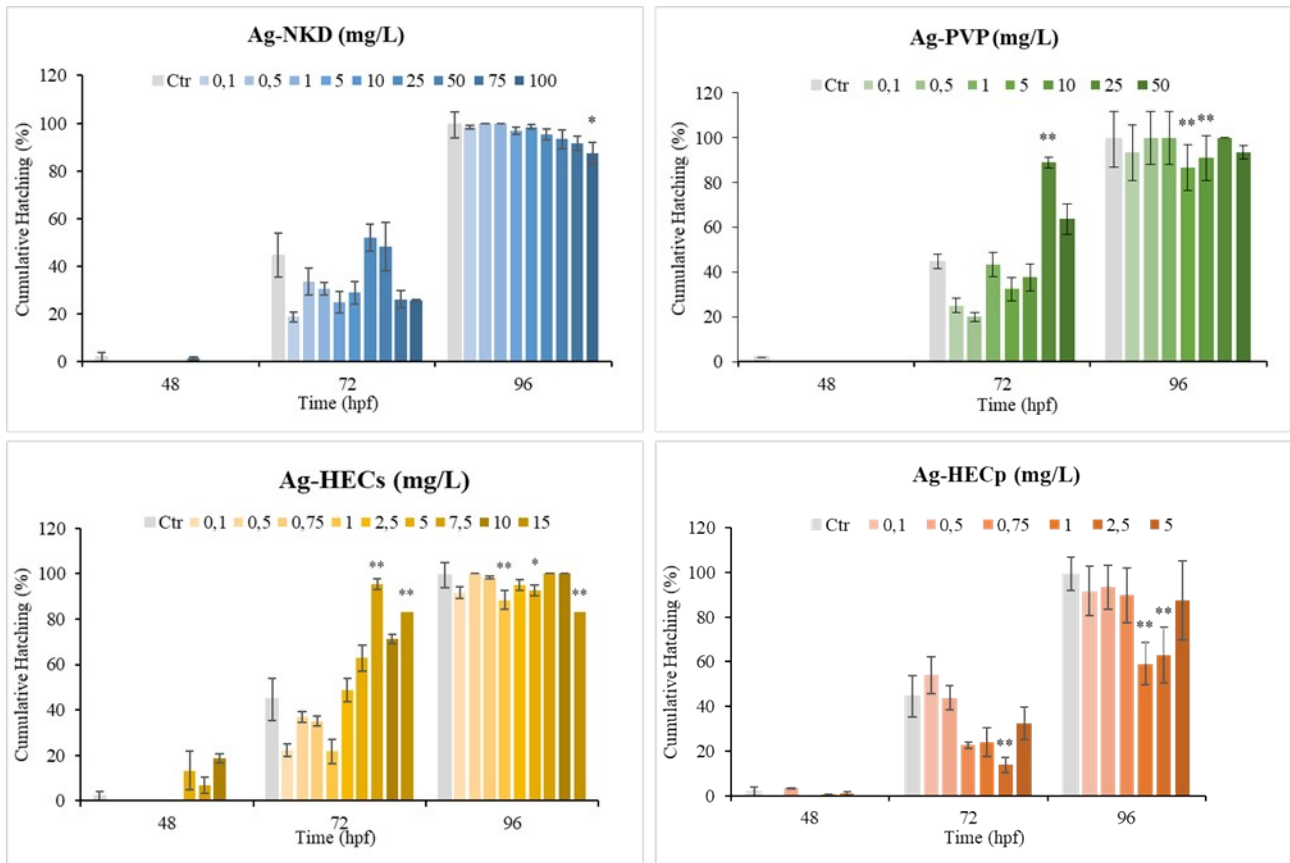

**Fig. S4** Cumulative percentage of hatched embryos in control and Ag-NPs exposed zebrafish during FET. All values in the graphs are given as mean  $\pm$  SE of at least three independent assays. \* $p < 0.05$ , \*\* $p < 0.01$  indicate statistical difference from control (ANOVA + post-hoc Bonferroni)

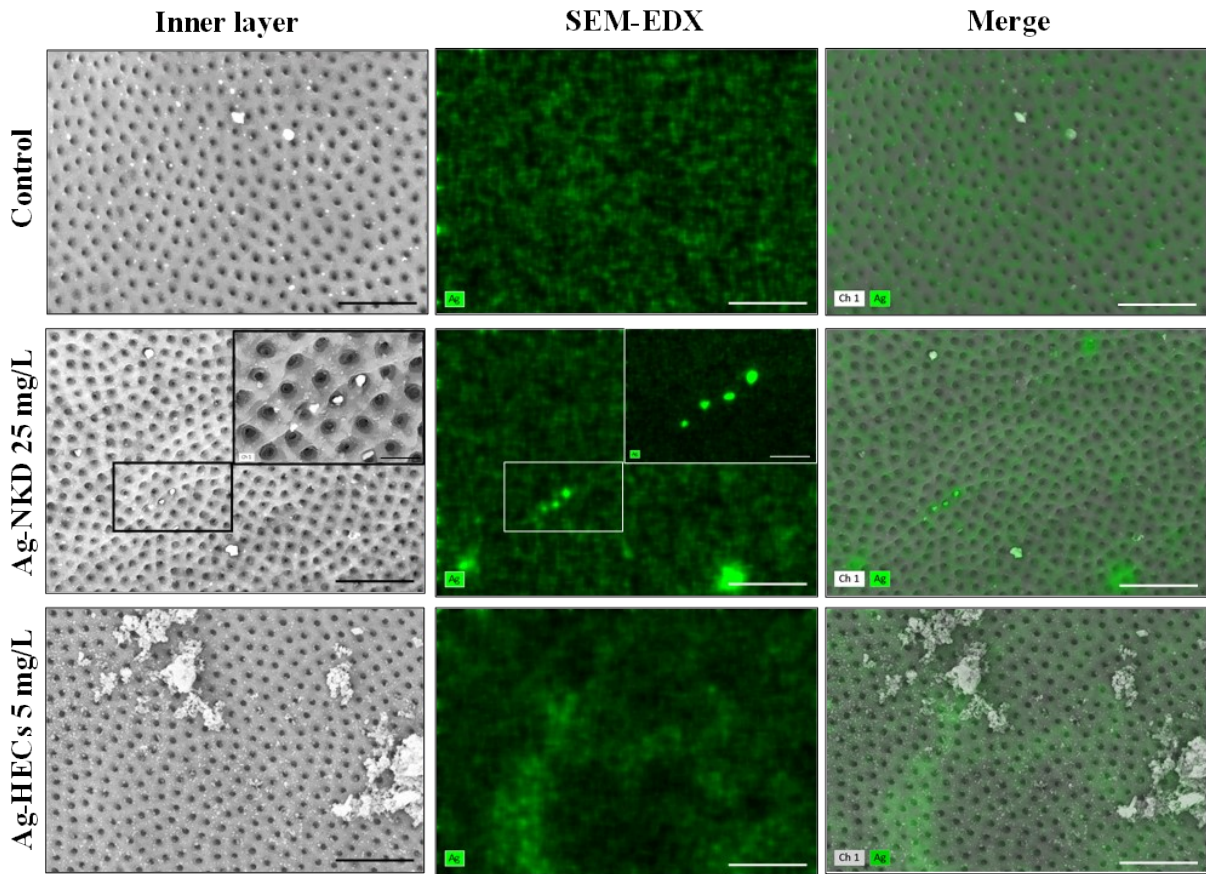

**Fig. S5** Scanning Electron Microscopy (SEM) and Energy-dispersive X-ray spectroscopy (EDX) investigations of the 48 hpf embryos' chorion inner surface. Representative images of chorion inner layer from Control, Ag-NKD and Ag-HECs (column 1); Ag is detected by SEM-EDX microanalysis. EDX map of Ag (column 2); chorion surface overlay with Ag EDX map (column 3). The inset is providing a magnification of Ag detection. Scale bar = 8  $\mu\text{m}$ ; magnification scale bar =2  $\mu\text{m}$

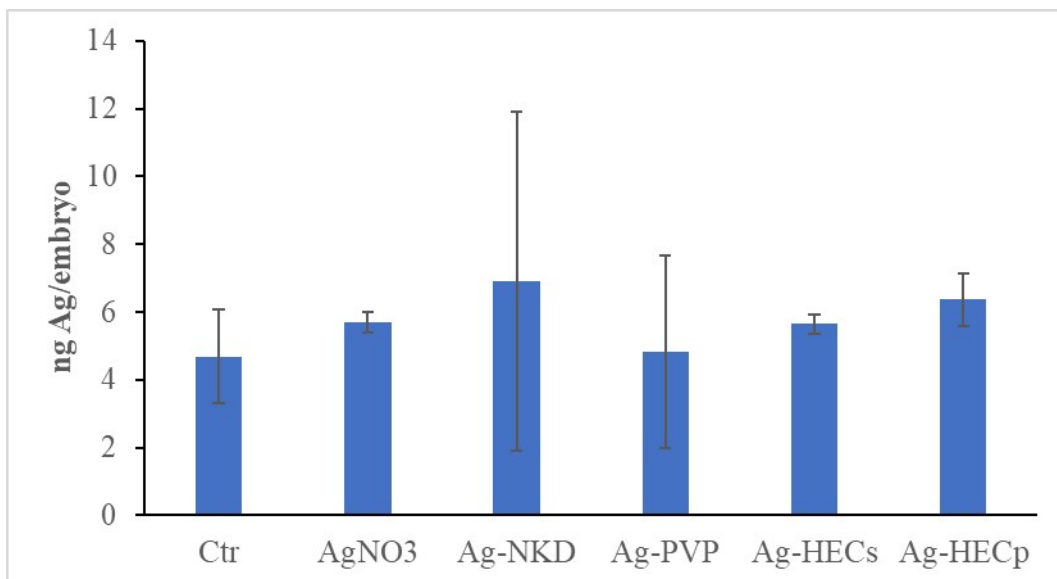

**Fig. S6** Silver uptake in zebrafish larvae at the end of FET test. Total silver ion concentrations were measured by ICP-OES in 96 hpf zebrafish exposed to 10 mg/L of Ag-NKD and Ag-PVP, 1 mg/L of Ag-HECs and Ag-HECp, 0.01 mg/L AgNO<sub>3</sub>. Data are presented as mean ± standard error of three independent pools of animals. No statistical difference from control and among different NPs (ANOVA + post-hoc Bonferroni).

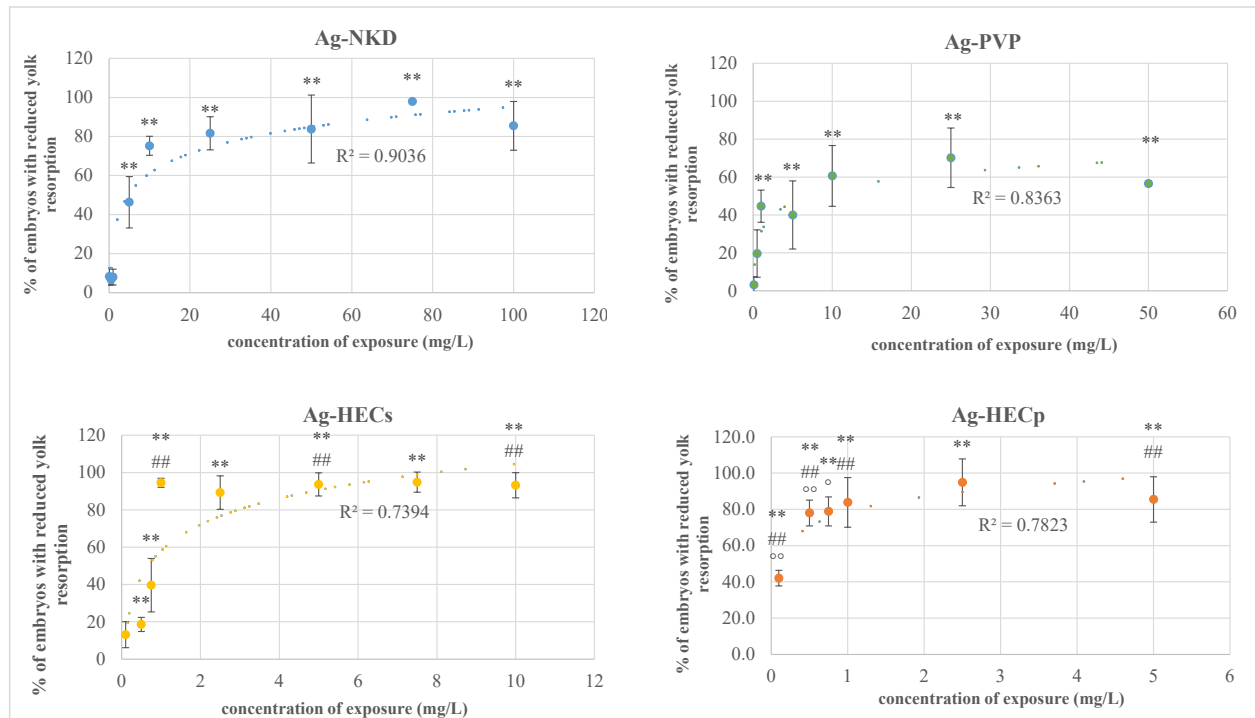

**Fig. S7** Percentage of 96 hpf zebrafish embryos exposed to AgNPs with reduced yolk resorption. All values in the graphs are given as mean ± SD of at least three independent assays. The dotted lines represent a logarithmic interpolation of the data with the relative R<sup>2</sup>. After log transformation of the concentrations, the straight line equations are:  $y = 34.215x + 26.795$  for Ag-NKD,  $y = 22.295x + 30.982$  for Ag-PVP,  $y = 46.532x + 58.114$  for Ag-HECs,  $y = 27.411x + 78.672$  for Ag-HECp. \* $p < 0.05$ , \*\* $p < 0.01$  indicate statistical difference from control; # $p < 0.05$ , ## $p < 0.01$  indicate statistical difference between Ag-HEC NPs and reference NPs; ° $p < 0.05$ , °° $p < 0.01$  indicate statistical difference between Ag-HECs and Ag-HECp NPs (ANOVA + Post-hoc Bonferroni).

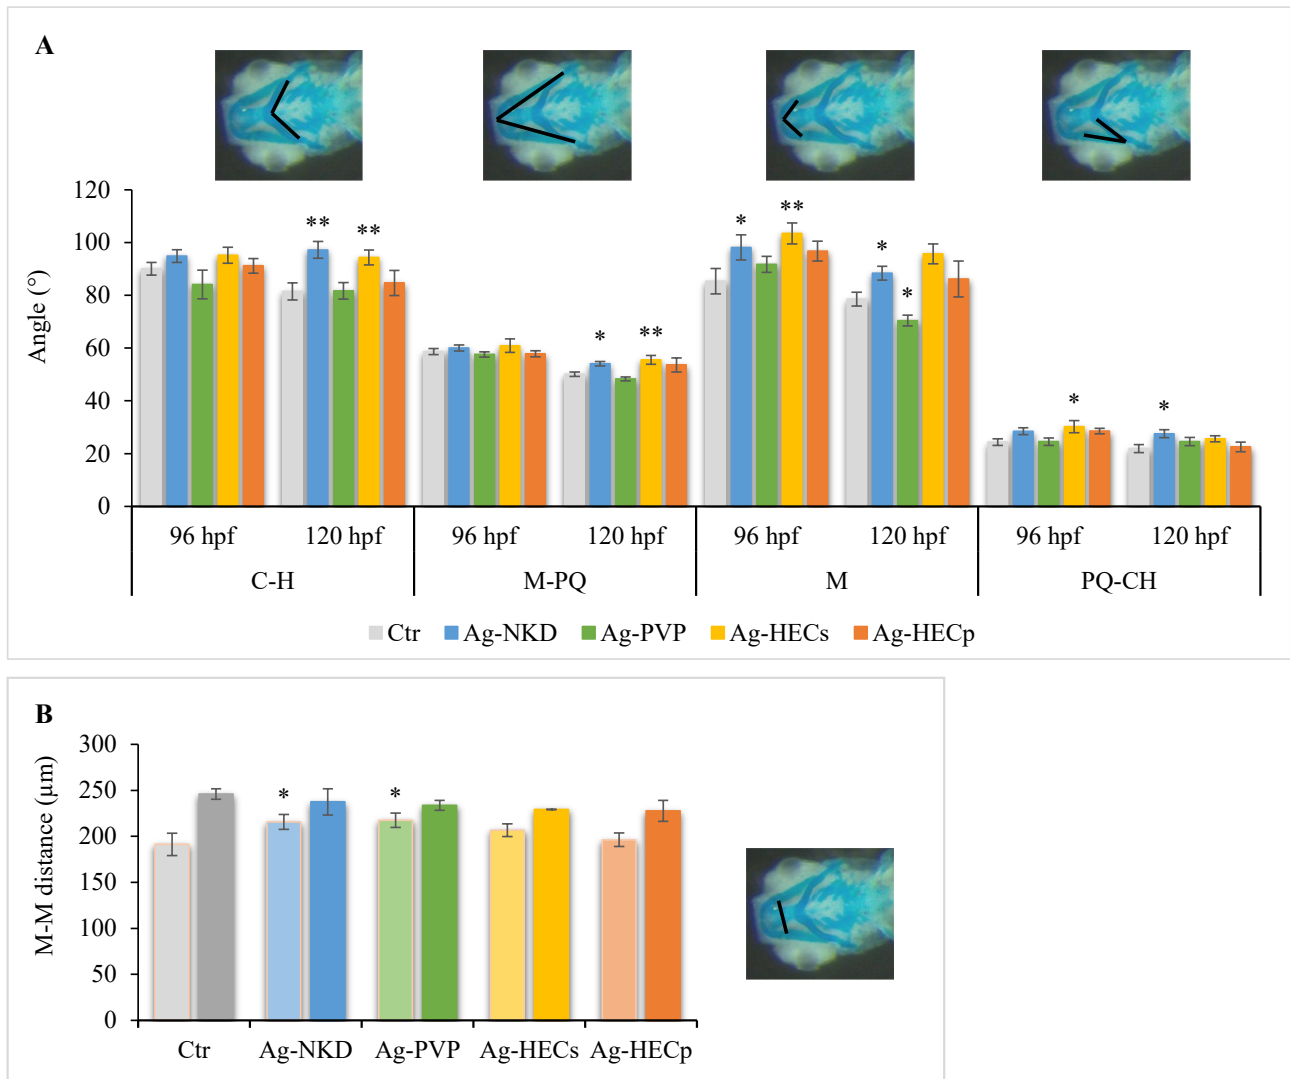

**Fig. S8** Craniofacial cartilages angles in 96 hpf (A) and 120 hpf (B) zebrafish embryos exposed until 96 hpf to Ag-NKD (10 mg/L), Ag-PVP (10 mg/L), Ag-HECs (5 mg/L) and Ag-HECp (1 mg/L) NPs. M = Meckel's cartilage; CH = ceratohyal cartilage; PQ = palatoquadrate cartilage

## TABLES

**Table S1** ICP-OES analysis for the determination of Ag-NPs dissolution in FET solution

|         | Exposure time (h) | Nominal concentration (mg/L) | Ag total concentration (mg/L) |                    | Ag released (mg/L) |                    | Percentage Ag released (%) |                    |
|---------|-------------------|------------------------------|-------------------------------|--------------------|--------------------|--------------------|----------------------------|--------------------|
|         |                   |                              | mean                          | standard deviation | mean               | standard deviation | mean                       | standard deviation |
| Ag NKD  | 0                 | 1                            | 0.000                         | 0.000              | 0.000              | 0.000              | 0.000                      | 0.000              |
|         |                   | 10                           | 2.567                         | 0.350              | 0.000              | 0.000              | 0.000                      | 0.000              |
|         |                   | 100                          | 38.050                        | 27.724             | 0.000              | 0.000              | 0.000                      | 0.000              |
|         | 24                | 1                            | 0.000                         | 0.000              | 0.000              | 0.000              | 0.000                      | 0.000              |
|         |                   | 10                           | 2.450                         | 0.592              | 0.000              | 0.000              | 0.000                      | 0.000              |
|         |                   | 100                          | 36.283                        | 13.176             | 0.117              | 0.041              | 0.322                      | 0.117              |
|         | 96                | 1                            | 0.000                         | 0.000              | 0.000              | 0.000              | 0.000                      | 0.000              |
|         |                   | 10                           | 2.667                         | 1.140              | 0.000              | 0.000              | 0.000                      | 0.000              |
|         |                   | 100                          | 36.983                        | 2.282              | 0.200              | 0.000              | 0.541                      | 0.033              |
| Ag PVP  | 0                 | 1                            | 0.217                         | 0.117              | 0.000              | 0.000              | 0.000                      | 0.000              |
|         |                   | 10                           | 2.800                         | 0.363              | 0.010              | 0.009              | 0.357                      | 0.046              |
|         |                   | 100                          | 28.217                        | 19.867             | 0.010              | 0.006              | 0.035                      | 0.025              |
|         | 24                | 1                            | 0.433                         | 0.103              | 0.000              | 0.000              | 0.000                      | 0.000              |
|         |                   | 10                           | 3.100                         | 0.141              | 0.000              | 0.000              | 0.000                      | 0.000              |
|         |                   | 100                          | 14.200                        | 6.275              | 0.007              | 0.005              | 0.047                      | 0.021              |
|         | 96                | 1                            | 0.583                         | 0.611              | 0.002              | 0.004              | 0.286                      | 0.299              |
|         |                   | 10                           | 2.450                         | 0.058              | 0.007              | 0.005              | 0.272                      | 0.006              |
|         |                   | 100                          | 15.067                        | 0.821              | 0.018              | 0.004              | 0.122                      | 0.007              |
| Ag HECs | 0                 | 1                            | 0.300                         | 0.167              | 0.000              | 0.000              | 0.000                      | 0.000              |
|         |                   | 10                           | 2.250                         | 0.327              | 0.033              | 0.052              | 1.481                      | 0.215              |
|         |                   | 100                          | 27.933                        | 4.196              | 0.067              | 0.052              | 0.239                      | 0.036              |
|         | 24                | 1                            | 0.267                         | 0.103              | 0.000              | 0.000              | 0.000                      | 0.000              |
|         |                   | 10                           | 2.717                         | 0.098              | 0.000              | 0.000              | 0.000                      | 0.000              |
|         |                   | 100                          | 58.750                        | 8.385              | 0.067              | 0.052              | 0.113                      | 0.016              |
|         | 96                | 1                            | 0.117                         | 0.183              | 0.000              | 0.000              | 0.000                      | 0.000              |
|         |                   | 10                           | 1.817                         | 0.679              | 0.050              | 0.055              | 2.752                      | 1.029              |
|         |                   | 100                          | 41.083                        | 8.403              | 0.225              | 0.050              | 0.548                      | 0.112              |
| Ag-HECp | 0                 | 1                            | 0.233                         | 0.082              | 0.000              | 0.000              | 0.000                      | 0.000              |
|         |                   | 10                           | 2.250                         | 0.208              | 0.000              | 0.000              | 0.000                      | 0.000              |
|         |                   | 100                          | 50.817                        | 21.146             | 0.002              | 0.004              | 0.003                      | 0.001              |
|         | 24                | 1                            | 0.317                         | 0.041              | 0.000              | 0.000              | 0.000                      | 0.000              |
|         |                   | 10                           | 2.367                         | 0.163              | 0.000              | 0.000              | 0.000                      | 0.000              |
|         |                   | 100                          | 43.350                        | 9.218              | 0.002              | 0.004              | 0.004                      | 0.001              |
|         | 96                | 1                            | 0.333                         | 0.151              | 0.003              | 0.005              | 1.000                      | 0.452              |
|         |                   | 10                           | 2.817                         | 0.098              | 0.007              | 0.010              | 0.237                      | 0.008              |
|         |                   | 100                          | 72.250                        | 5.236              | 0.002              | 0.004              | 0.002                      | 0.000              |



**Table S2** 96 hpf-EC<sub>50</sub> values for each abnormal phenotype in 96 hpf larvae exposed to Ag-NPs

|                | 96 hpf EC <sub>50</sub> |       |       |      |      |       |       |       |       |      |
|----------------|-------------------------|-------|-------|------|------|-------|-------|-------|-------|------|
|                | CD                      | OT    | EM    | HE   | AD   | YD/E  | GR    | ST    | IF    | RYR  |
| <b>Ag-NKD</b>  | 91.3                    | 143.9 | 115.6 | 85.1 | 41.3 | 114.3 | 160.3 | 112.4 | 60.7  | 17.9 |
| <b>Ag-PVP</b>  | 54.9                    | 525.3 | 107.8 | 36.5 | 52.8 | 38.6  | nd    | 126.8 | 449.8 | 18.6 |
| <b>Ag-HECs</b> | 8.4                     | 11.5  | 10.7  | 7.1  | 6.5  | 7.7   | 8.6   | 11.6  | 10.7  | 1.7  |
| <b>Ag-HECp</b> | 4.2                     | 8.6   | 5.6   | 3.9  | 3.0  | 4.8   | 10.9  | 10.9  | 8.0   | 1.3  |

CD = craniofacial defects, OT = Otoliths defects, EM = eye malformations, HE = hearth edema, AD = axial defects, YD/E= yolk deformation/edema, RYR= reduced yolk resorption, GR = general growth retardation
